# Supplementary material for: Fabrication and functionalization of 3D-printed soft and hard scaffolds with growth factors for enhanced bioactivity
Source: Royal Society of Chemistry journal article supplement (doi:10.1039/d0ra08295c), 2020-01-01
Supplement: d0ra08295c1.pdf [file d0ra08295c1.pdf]

Supplementary Information

## Fabrication and functionalisation of 3D printed soft and hard scaffolds with growth factors for enhanced bioactivity

Jiya Jose<sup>†#</sup>, Sahar Sultan<sup>†</sup>, Nandakumar Kalarikkal<sup>#</sup>, Sabu Thomas<sup>#</sup> and Aji P. Mathew<sup>†\*</sup>

<sup>†</sup>Department of Materials and Environmental Chemistry, Stockholm University, SE-10691, Stockholm, Sweden

<sup>#</sup>International and inter University, Center for Nanoscience and Nanotechnology, Mahatma Gandhi University, Kottayam-686 560, Kerala, India

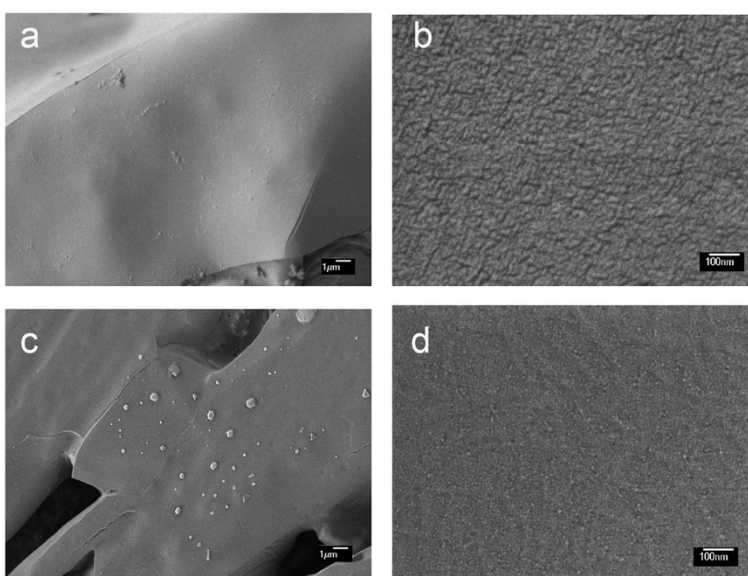

Figure S1. SEM images for a)Dop-CNC and b) Dop- CNC-FGF-18 hydrogel scaffolds and c) Dop-PLA and d) Dop-PLA- RGD scaffolds

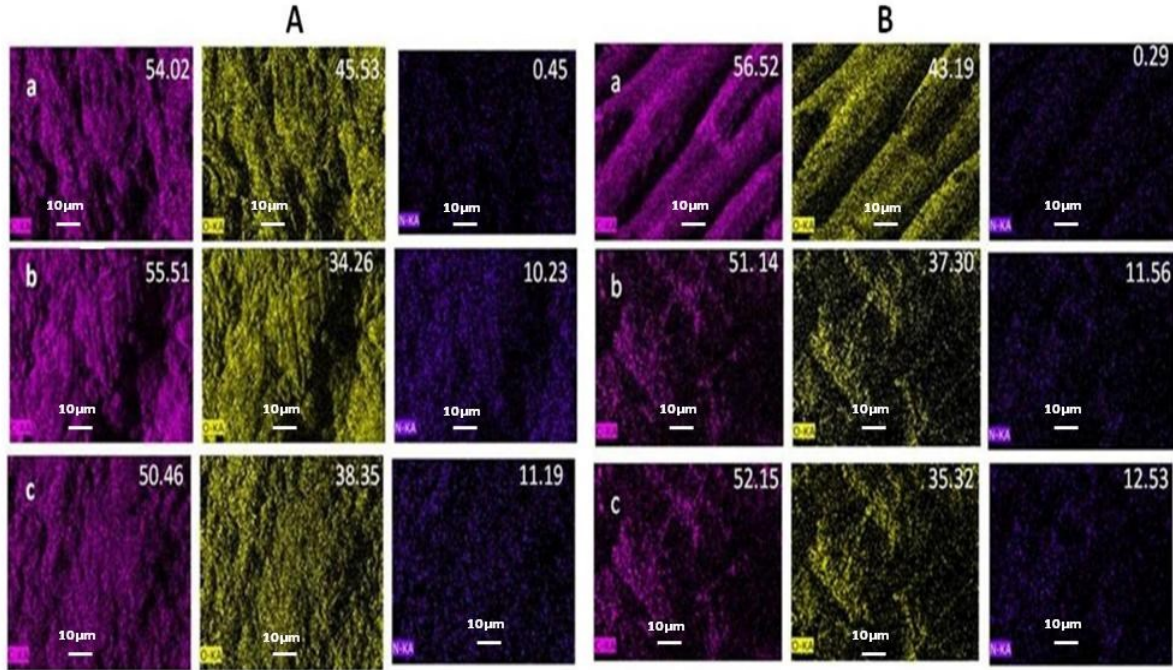

Figure S2: **A.** EDS patterns showing C, O N distribution on (a) CNC(b) Dop-CNC(c) Dop-CNC-FGF-18 and **B.** (a) PLA (b) Dop-PLA (c) Dop -PLA –RGD scaffolds. The % concentrations of C, O and N are given in each case.

Swelling and pH change in aqueous environment was evaluated for the 3D printed PLA scaffolds. Scaffolds were weighed ( $W_{dry}$ ) and immersed in distilled water at 37°C with gentle shaking. The scaffolds were taken out at different time intervals (12, 24, 48 and 72 hrs) and excess water was removed with the help of a filter paper and weighed ( $W_{wet}$ ). Further the percentage swelling was calculated using equation (1).

$$\text{Swelling (\%)} = \frac{W_{wet} - W_{dry}}{W_{dry}} \times 100 \quad (1)$$

The pH value of the scaffolds at different time points (0, 5, 10, 15 and 20 days) were also measured using a pH meter.

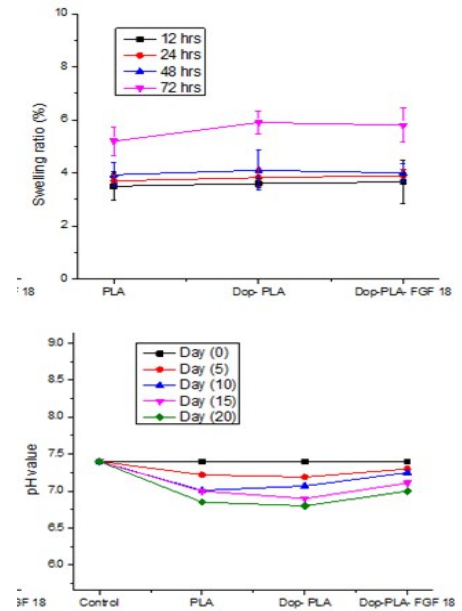

Figure S3: Swelling and pH change in aqueous medium

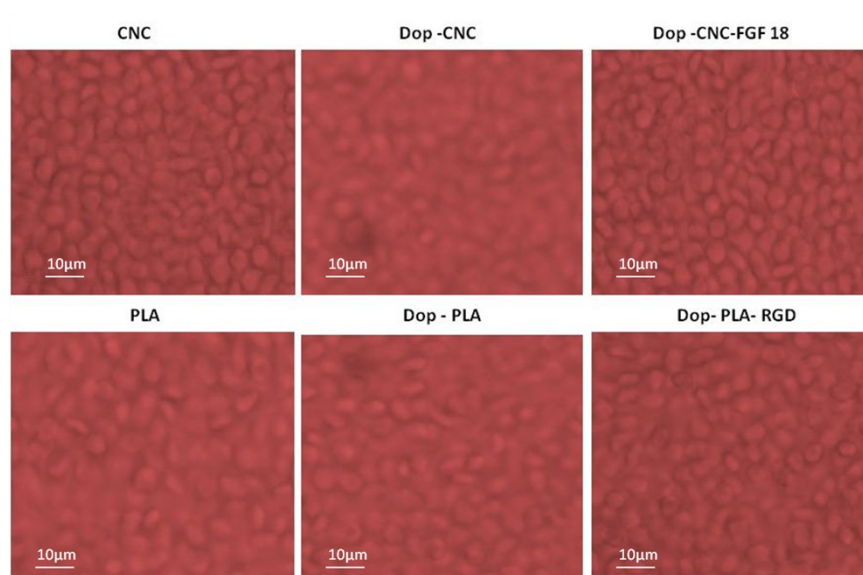

Figure S4: Microscopic images of RBC aggregation study after the incubation of CNC, Dop-CNC, Dop-CNC-FGF18, PLA, Dop-PLA and Dop-PLA-RGD.
